# Supplementary figures and images for: Influence of storage temperature on the stability of heat treated phycocyanin-λ-carrageenan complexes in liquid formulations
Source: Royal Society of Chemistry journal article supplement (doi:10.1039/d2gc00809b), 2022-01-01

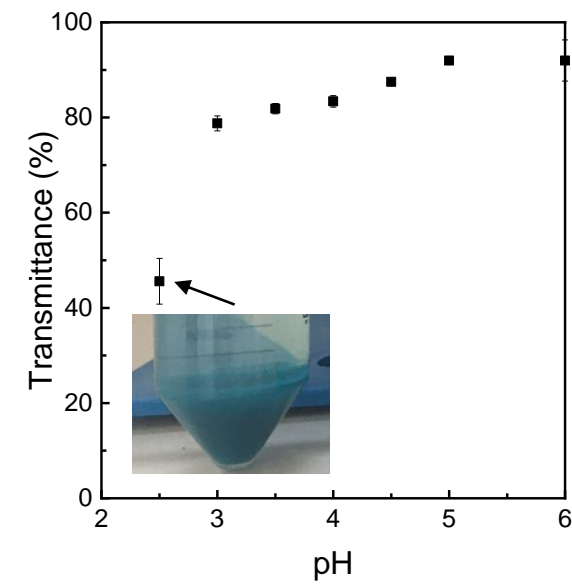

Supplement: d2gc00809b2.pdf [file d2gc00809b2.pdf]
